# Supplementary material for: REDD1 functions at the crossroads between the therapeutic and adverse effects of topical glucocorticoids
Source: PubMed Central journal article supplement (PMC4309667; doi:10.15252/emmm.201404601), 2014-12-11
Supplement: emmm0007-0042-sd2.pdf [file emmm0007-0042-sd2.pdf]

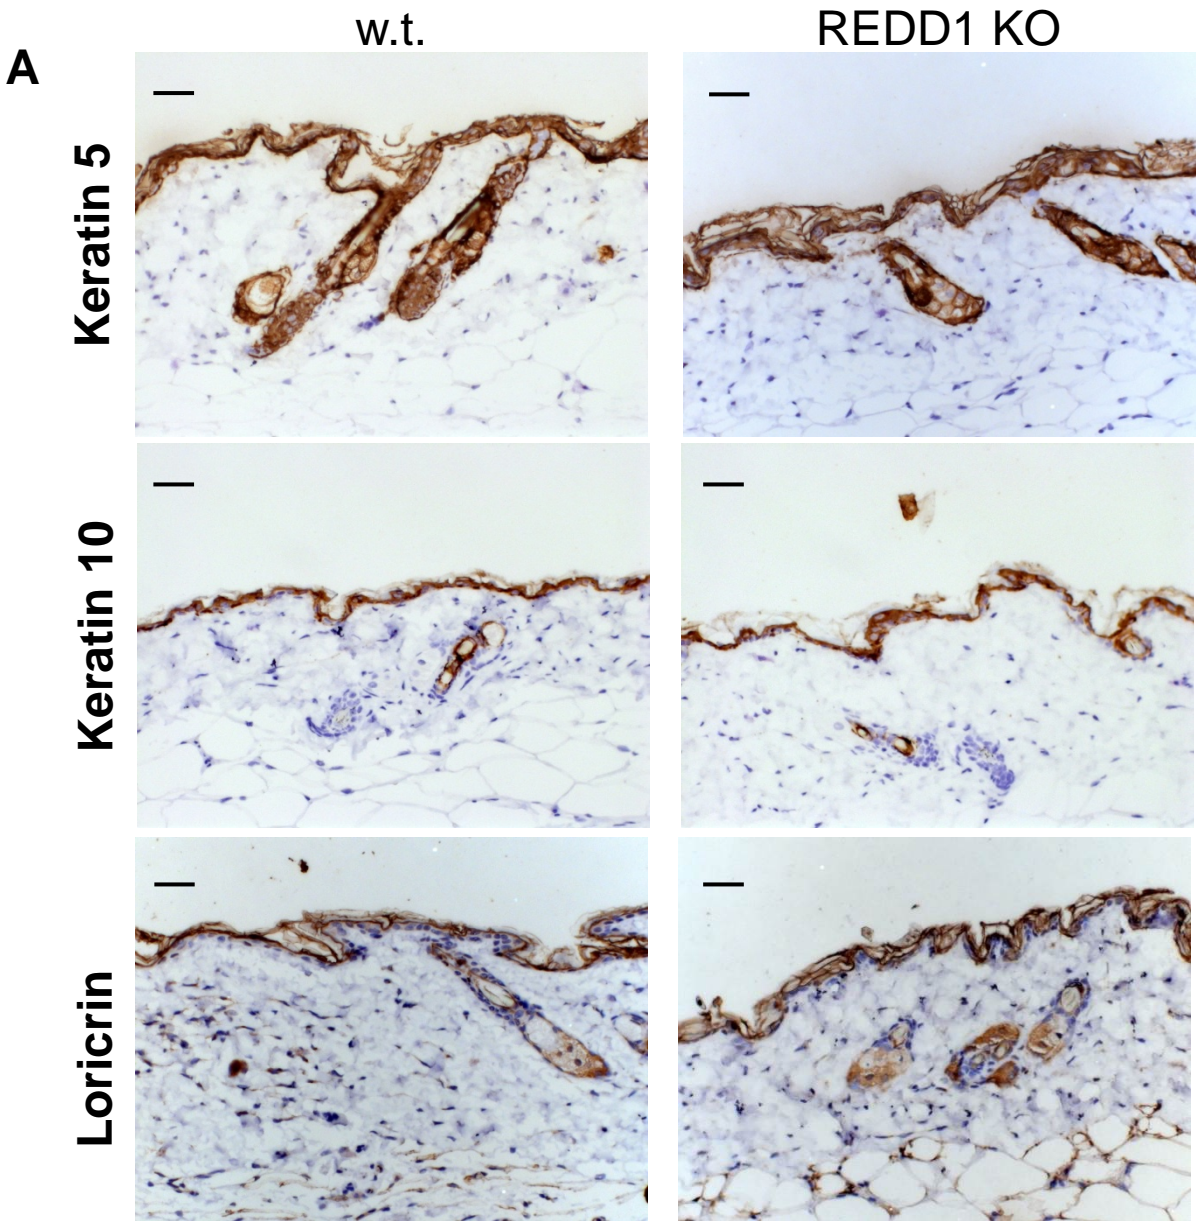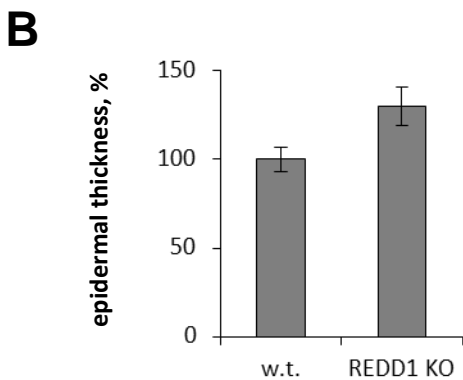

**Supplemental Figure 2. Mild skin phenotype in REDD1 KO untreated animals.** **A.** Immunohistochemical staining of untreated B6x129 w.t. and REDD1 KO murine skin sections for expression of epidermal keratinocyte markers loricrin, keratin 5, and keratin 10. **B.** Morphometric analysis of the H&E stained sections of B6x129 w.t. and REDD1 KO mouse skin. REDD1 KO skin thickness is presented as % to thickness of w.t. epidermis.
