# Supplementary material for: REDD1 functions at the crossroads between the therapeutic and adverse effects of topical glucocorticoids
Source: PubMed Central journal article supplement (PMC4309667; doi:10.15252/emmm.201404601), 2014-12-11
Supplement: emmm0007-0042-sd5.pdf [file emmm0007-0042-sd5.pdf]

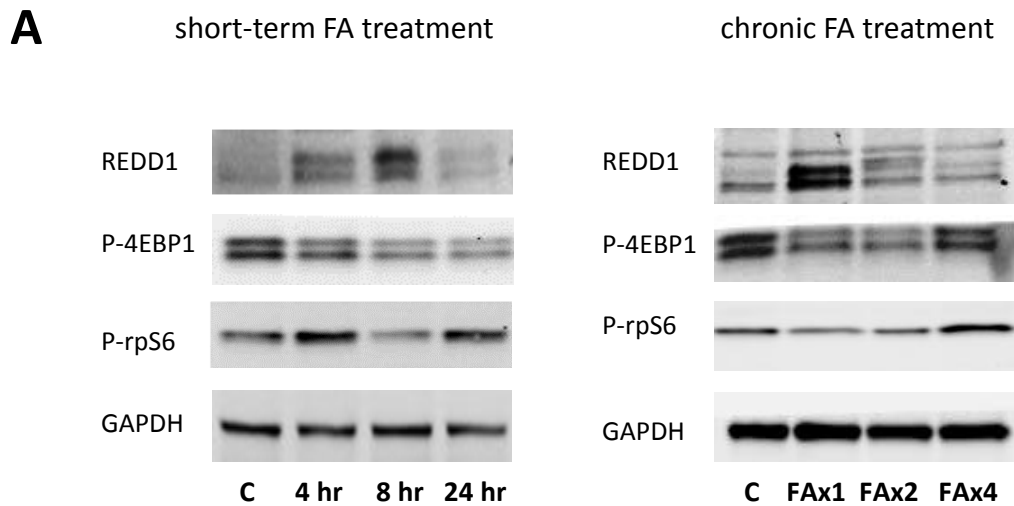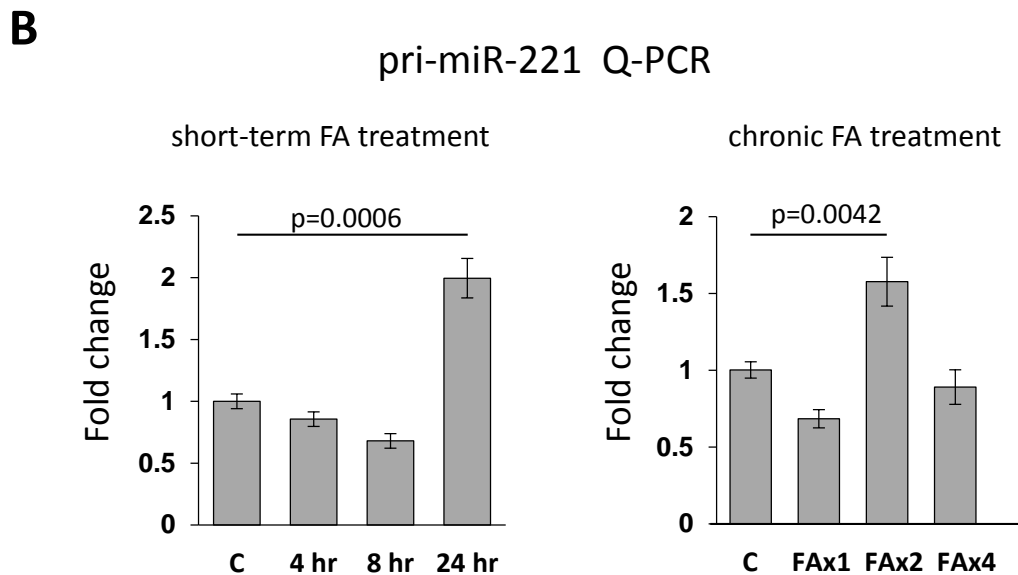

**Supplemental Figure 5. Inverse correlation between pri-miR-221 and REDD1 expression during glucocorticoid treatment.** B6D2 mice were treated with FA topically as described in Materials and Methods, epidermis was harvested at indicated time points. **A.** Western blot analysis. **B.** Q-PCR analysis of primary miR-221. Data are expressed as the fold change (mean  $\pm$  SD) with respect to the controls (unpaired two-tailed t-test,  $n = 3$ ).
