# Supplementary material for: REDD1 functions at the crossroads between the therapeutic and adverse effects of topical glucocorticoids
Source: PubMed Central journal article supplement (PMC4309667; doi:10.15252/emmm.201404601), 2014-12-11
Supplement: emmm0007-0042-sd6.pdf [file emmm0007-0042-sd6.pdf]

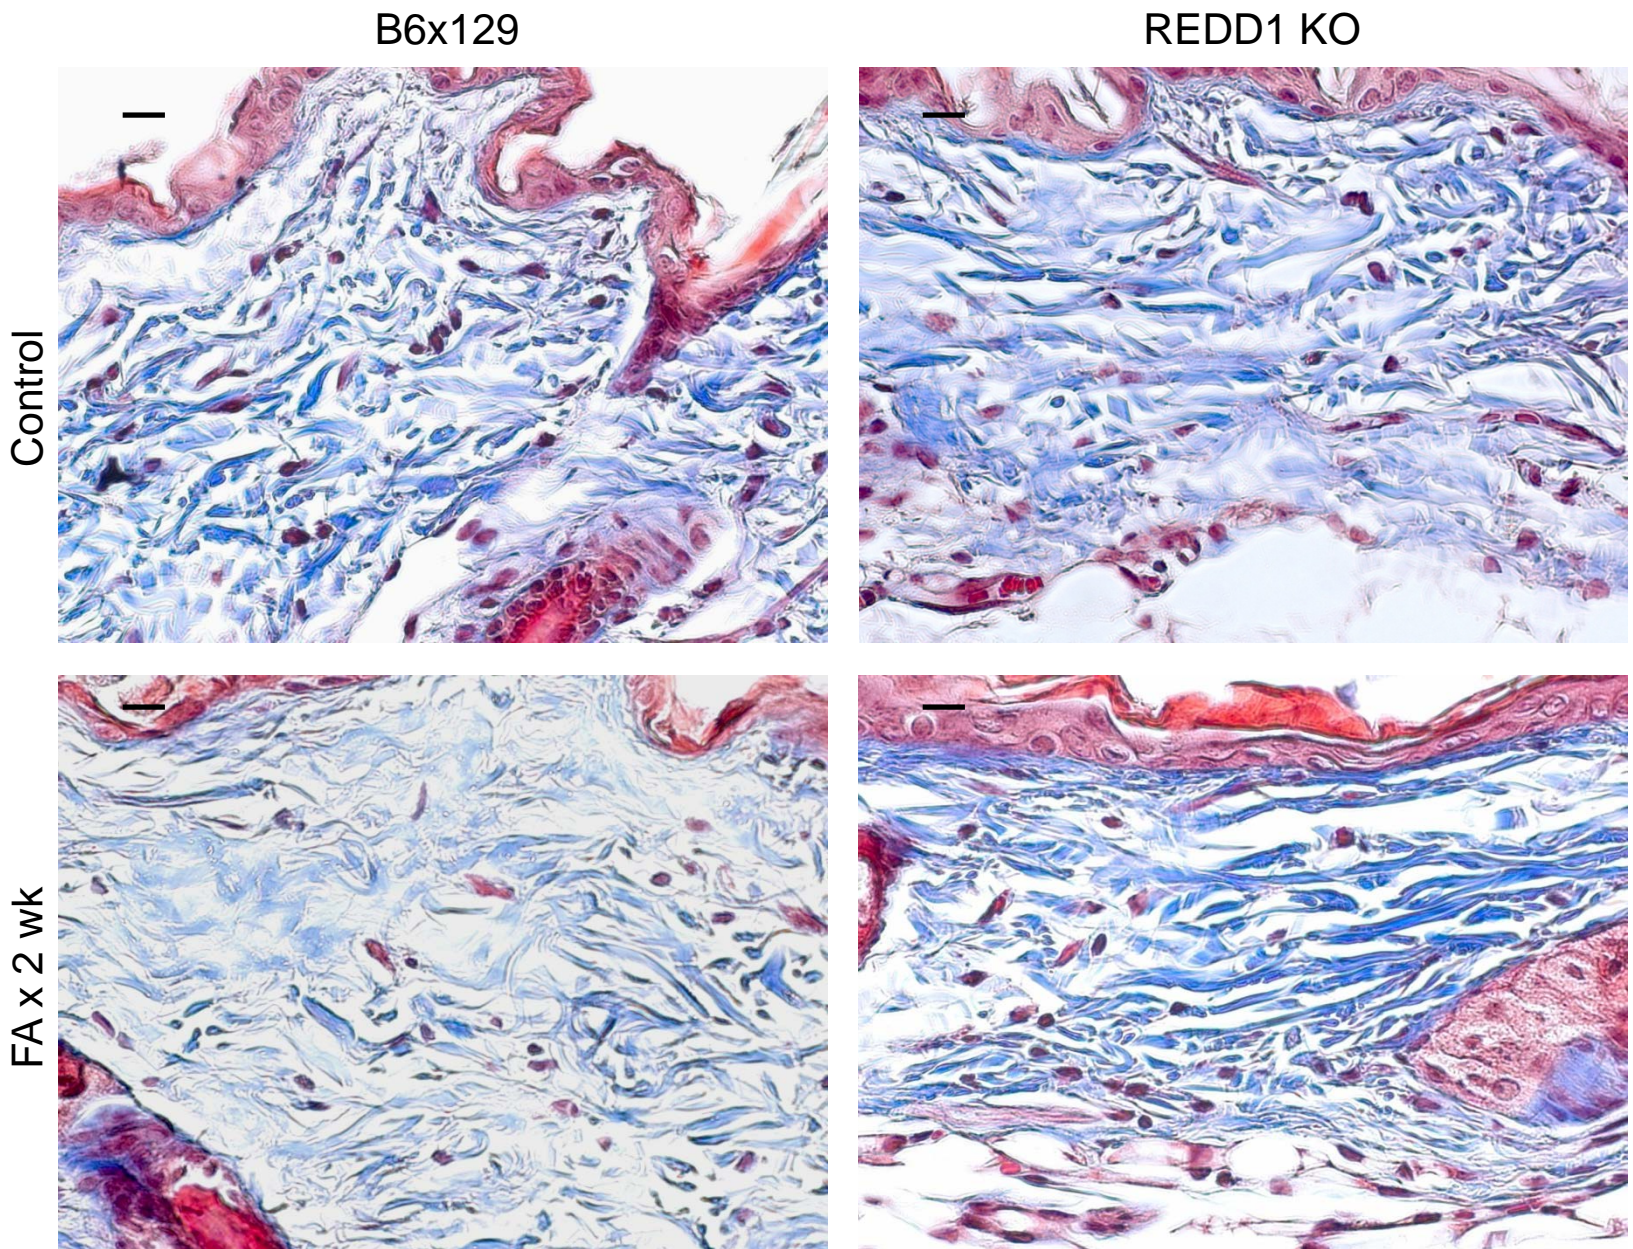

**Supplemental Figure 6. Resistance of REDD1 KO mice to glucocorticoid-induced decrease of dermal cellularity.** REDD1 KO and isogenic w.t. B6x129 mice were treated with acetone (vehicle control) or FA (2  $\mu\text{g}/\text{animal}$ ) every 72 hr for 2 wk. Formalin-fixed paraffin-embedded skin sections were used for Masson's trichrome staining. Dermis/collagen fibers are blue, muscle is red, nuclei are dark red, and cytoplasm is red/pink. Scale bars are 40  $\mu\text{m}$ . **Note:** strongly decreased number of dermal fibroblasts in the skin of w.t. mice treated with FA x 2 wk.
